# Supplementary material for: USP8 maintains embryonic stem cell stemness via deubiquitination of EPG5
Source: PubMed Central journal article supplement (PMC6443784; doi:10.1038/s41467-019-09430-4), 2019-04-01
Supplement: 41467_2019_9430_MOESM1_ESM.pdf [file 41467_2019_9430_MOESM1_ESM.pdf]

# Supplementary Figures

## Supplementary Figure 1 *Epg5* silencing inhibits ESC self-renewal and pluripotency

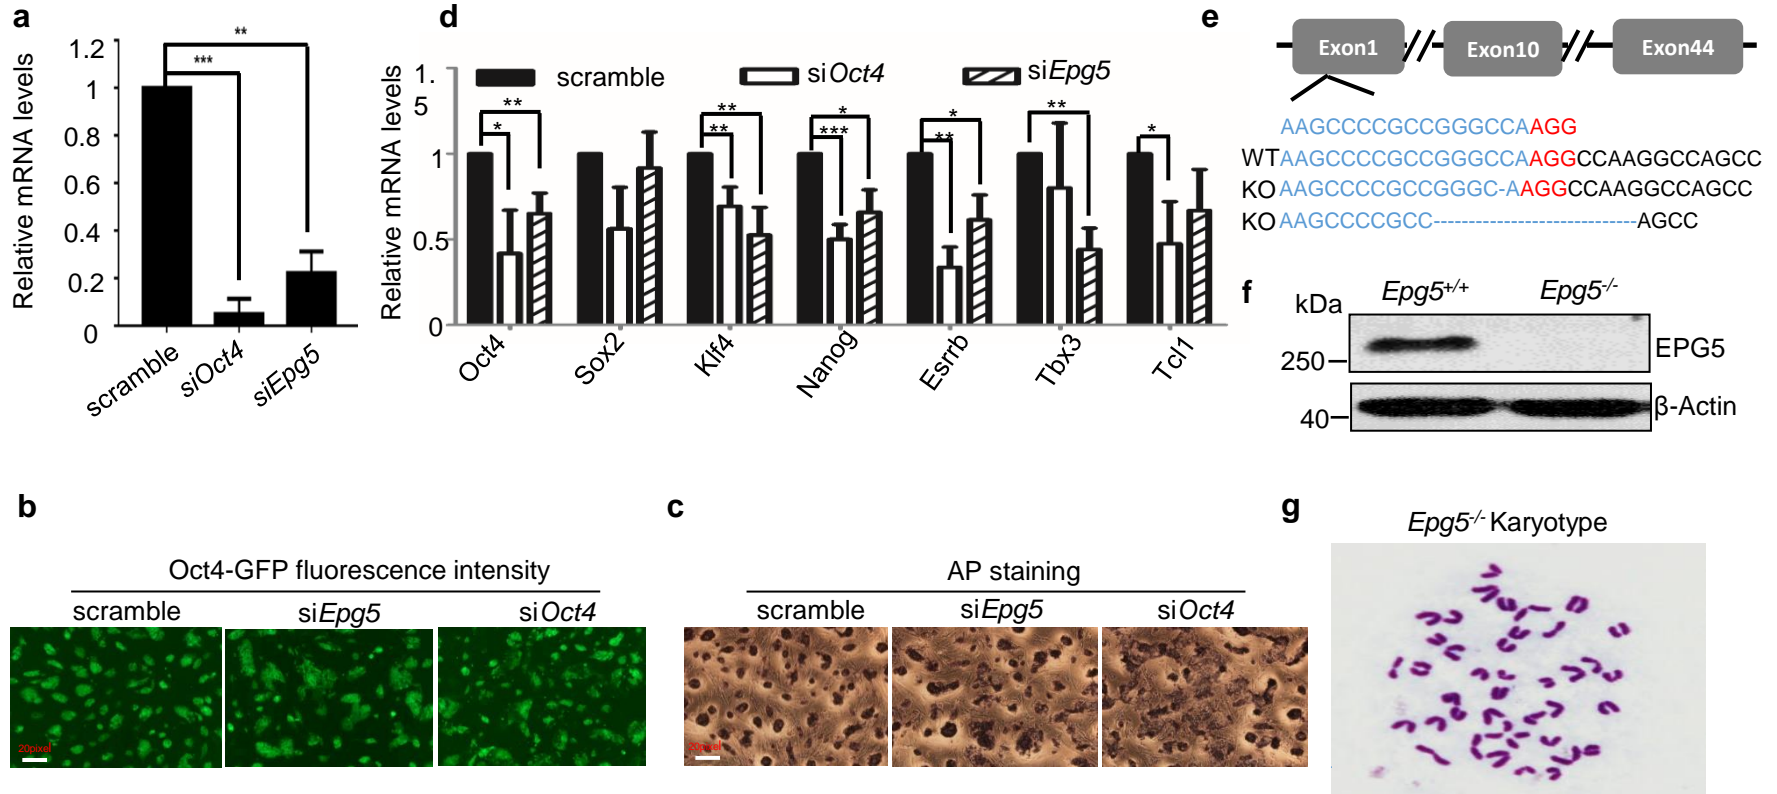

**Supplementary Figure 1** *Epg5* silencing inhibits ESC self-renewal and pluripotency. **(a)** Transfection of *Oct4*- and *Epg5*-specific siRNAs significantly inhibits *Oct4* and *Epg5* mRNA expression. Error bars indicate the S.D.  $n=3$ . Three independent biological replicates. \*\*,  $P<0.01$ , \*\*\*,  $P<0.001$  by unpaired two-tailed Student's *t*-test. **(b)** and **(c)** The GFP fluorescence intensity and AP staining of ESC colonies after knockdown of *Oct4* and *Epg5*. Scale bars, 20 pixel **(d)** Knockdown of *Epg5* significantly decreases pluripotency gene expression in ESCs. Error bars indicate the S.D.  $n=3$ . Three independent biological replicates. \*,  $P<0.05$ ; \*\*,  $P<0.01$ , \*\*\*,  $P<0.001$  by unpaired two-tailed Student's *t*-test. **(e)** The sgRNA designed for targeting the first exon of *Epg5*. **(f)** Western blot analysis of whole cell extracts from *Epg5*<sup>+/+</sup> and *Epg5*<sup>-/-</sup> ESCs.  $\beta$ -Actin serves as the loading control. **(g)** The *Epg5*<sup>-/-</sup> ESCs have a normal karyotype. Scale bars, 2  $\mu$ m.

## Supplementary Figure 2 *Epg5* silencing did not affect ESC apoptosis

**a**

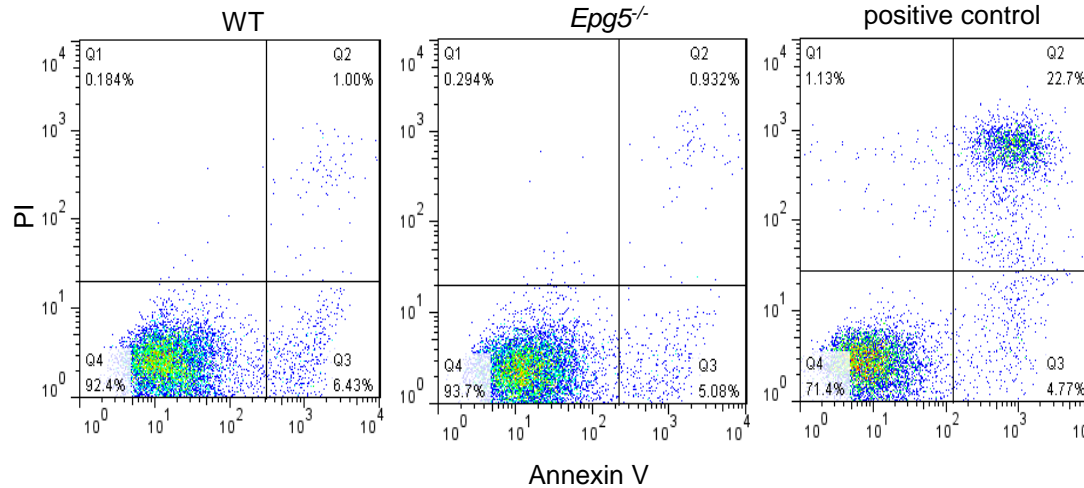

**b**

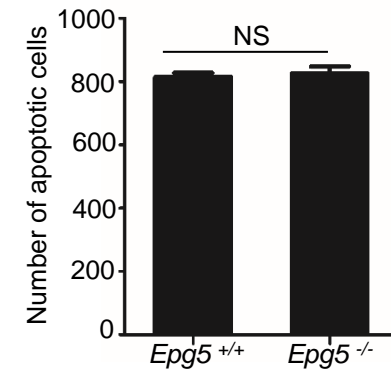

**Supplementary Figure 2** *Epg5* silencing does not affect ESC apoptosis. **(a)** and **(b)** The WT, *Epg5*<sup>-/-</sup> and H<sub>2</sub>O<sub>2</sub>-treated ESCs were stained with PI and Annexin V and analyzed on a FACS. Double-negative ESCs were counted as viable cells. Cells treated with H<sub>2</sub>O<sub>2</sub> were used as a positive control. Error bars indicate the S.D. n = 3. Three independent biological replicates. NS: not significant by unpaired two-tailed Student's *t*-test.

## Supplementary Figure 3 Identification of USP8 as a regulator to maintain ESC identity

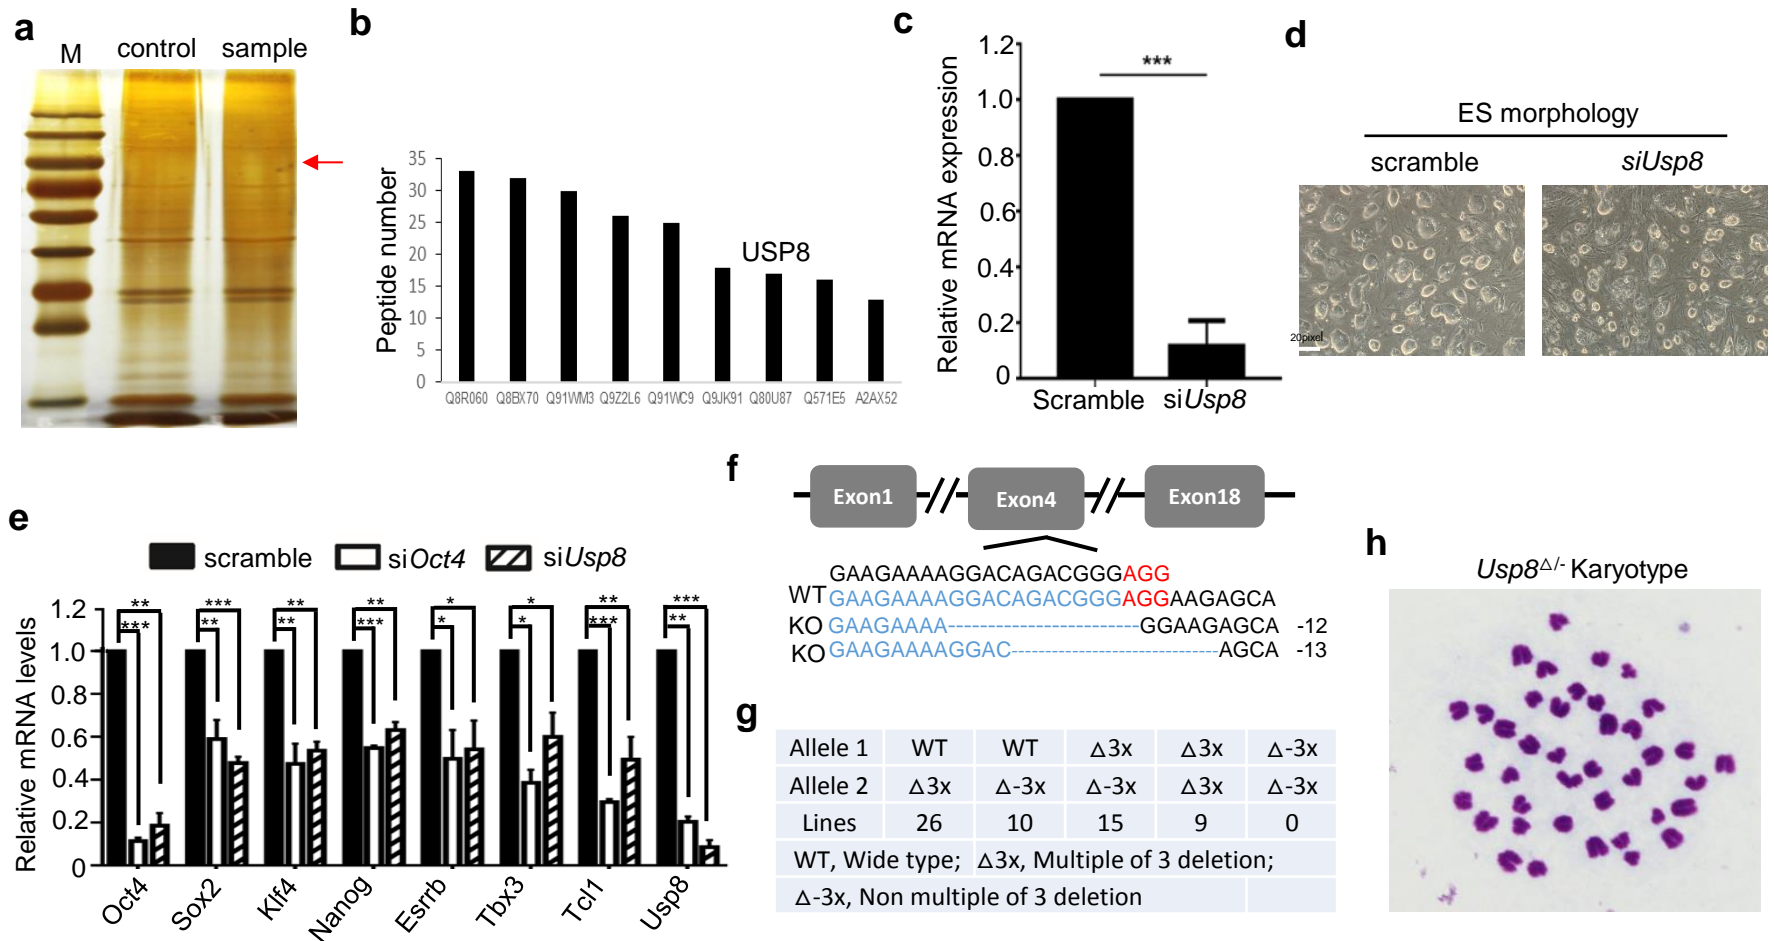

**Supplementary Figure 3** Identification of USP8 as a regulator that maintains ESC identity. **(a)** Silver staining of proteins precipitated by the coiled-coil domain of EPG5. The red arrow indicates EPG5 interacting proteins. **(b)** Nine proteins interacting with EPG5 were identified by LC-MS/MS mass spectrometry. **(c)** Transfection of *Usp8*-specific siRNA significantly inhibits *Usp8* mRNA expression. Error bars indicate the S.D.  $n = 3$ . Three independent biological replicates. \*\*\*,  $P < 0.001$  by unpaired two-tailed Student's *t*-test. **(d)** The morphology of ESC colonies upon *Usp8* knockdown. Scale bars, 20 pixel. **(e)** The relative mRNA expression of pluripotency genes was detected in WT, si*Oct4* and si*Usp8* ESCs by quantitative PCR. Error bars indicate the S.D.  $n = 3$ . Three independent biological replicates. \*\*\*,  $P < 0.001$ , \*\*,  $P < 0.01$ , \*,  $P < 0.05$  by unpaired two-tailed Student's *t*-test. **(f)** The sgRNA designed for targeting the fourth exon of *Usp8*. Sequencing confirmed an 12 bp deletion in one allele and a 13 bp deletion in another allele (*Usp8* $\Delta$ -), resulting in decreased expression of a truncated USP8. **(g)** Summary of indels obtained on *Usp8* targeting. **(h)** The karyotype of the *Usp8* $\Delta$ - cell line is normal. Scale bars, 2 pm.

## Supplementary Figure 4 *Usp8* decrease did not affect ESC apoptosis

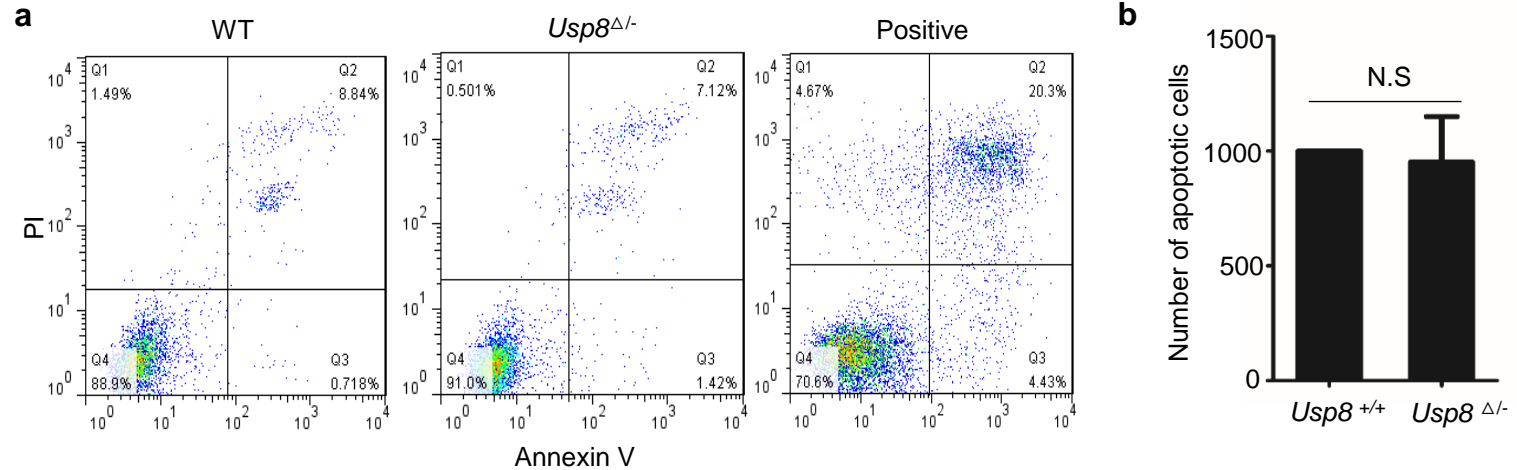

**Supplementary Figure 4** *Usp8* reduction does not affect ESC apoptosis. **(a)** and **(b)** The WT, *Usp8*<sup>Δ/Δ</sup>, and H<sub>2</sub>O<sub>2</sub>-treated ESCs were stained with PI and Annexin V and analyzed on a FACS. Double-negative ESCs were counted as viable cells. Error bars indicate the S.D. n = 3. Three independent biological replicates. NS: not significant by unpaired two-tailed Student's *t*-test.

## Supplementary Figure 5 EPG5 is degraded by autophagy

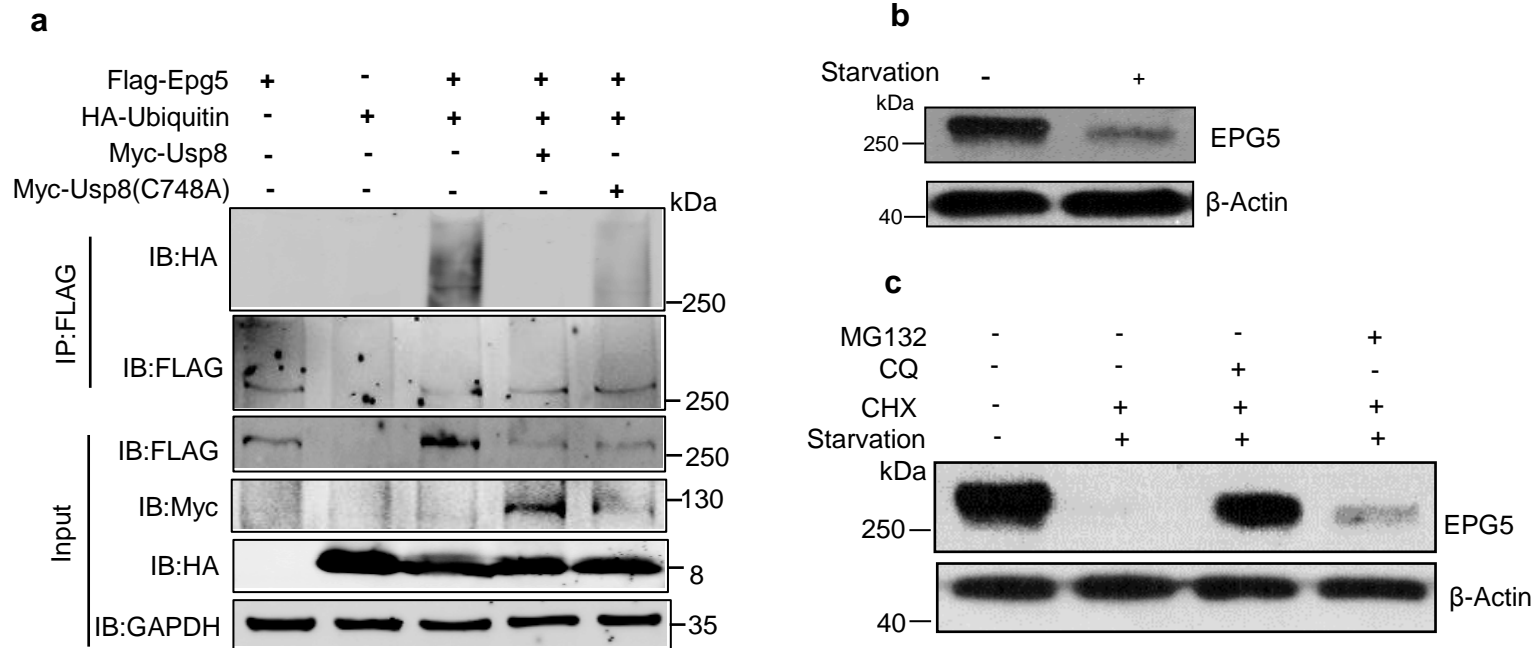

**Supplementary Figure 5** EPG5 is degraded by autophagy. **(a)** USP8 deubiquitinates EPG5. Lysates of HEK293T cells transfected with plasmids expressing Flag-*Epg5*, HA-*Ubiquitin*, Myc-*Usp8* or Myc-*Usp8*(C748A) were immunoprecipitated with anti-FLAG and immunoblotted with anti-HA and anti-FLAG. Input cell lysates were immunoblotted with anti-FLAG, anti-Myc, anti-HA and anti-GAPDH as controls. **(b)** Western blot analysis of whole cell extracts from ESCs treated with or without starvation (EBSS starvation for 5h).  $\beta$ -Actin served as the loading control. **(c)** ESCs were treated with or without cycloheximide. Then, western blot analysis of whole cell extracts from ESCs either treated with MG132 or Chloroquine (CQ) under starvation condition.  $\beta$ -Actin served as a loading control.

## Supplementary Figure 6 EPG5 and USP8 expression

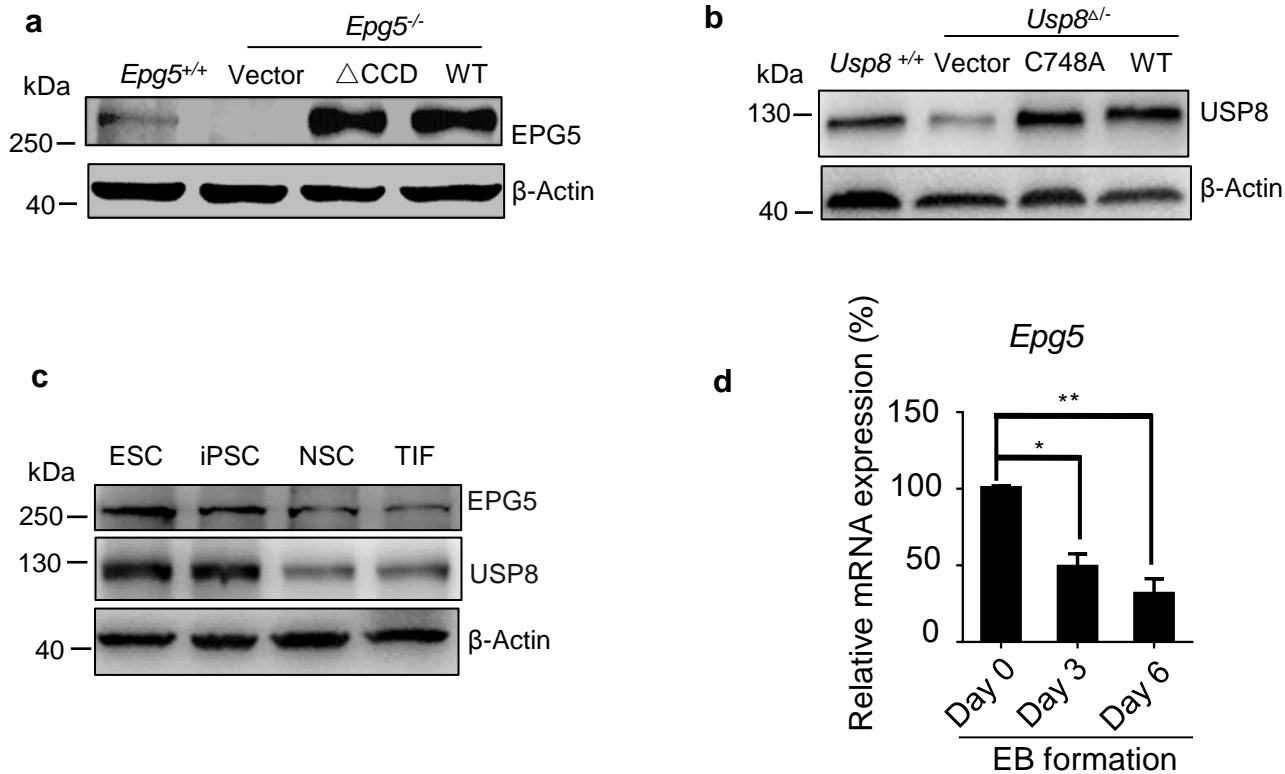

**Supplementary Figure 6** EPG5 and USP8 expression. **(a)** Western blotting for EPG5 in WT, *Epg5*<sup>-/-</sup> ESCs reintroduced of empty vector, WT or  $\Delta$ CCD mutant *Epg5*.  $\beta$ -Actin served as a loading control. **(b)** Western blotting for *Usp8*<sup>+/+</sup> ESCs and *Usp8* <sup>$\Delta$ /-</sup> ESCs reintroduced of empty vector, WT or C748A mutant *Usp8*. **(c)** Western blotting for EPG5 and USP8 in mouse ESC, iPSC, Neuron stem cell (NSC) and tail fibroblast (TIF). Data shown are representative of 3 independent experiments. **(d)** *Epg5* expression decreased along with embryoid body (EB) differentiation. The relative mRNA expression levels of *Epg5* during EB differentiation by quantitative PCR on the indicated days. Error bars indicate the S.D. n = 3. Three independent biological replicates. \*\*, P<0.01, \*, P<0.05 by unpaired two-tailed Student's t-test.

## Supplementary Figure 7 USP8 regulates ESC self-renewal and pluripotency through deubiquitination of EPG5

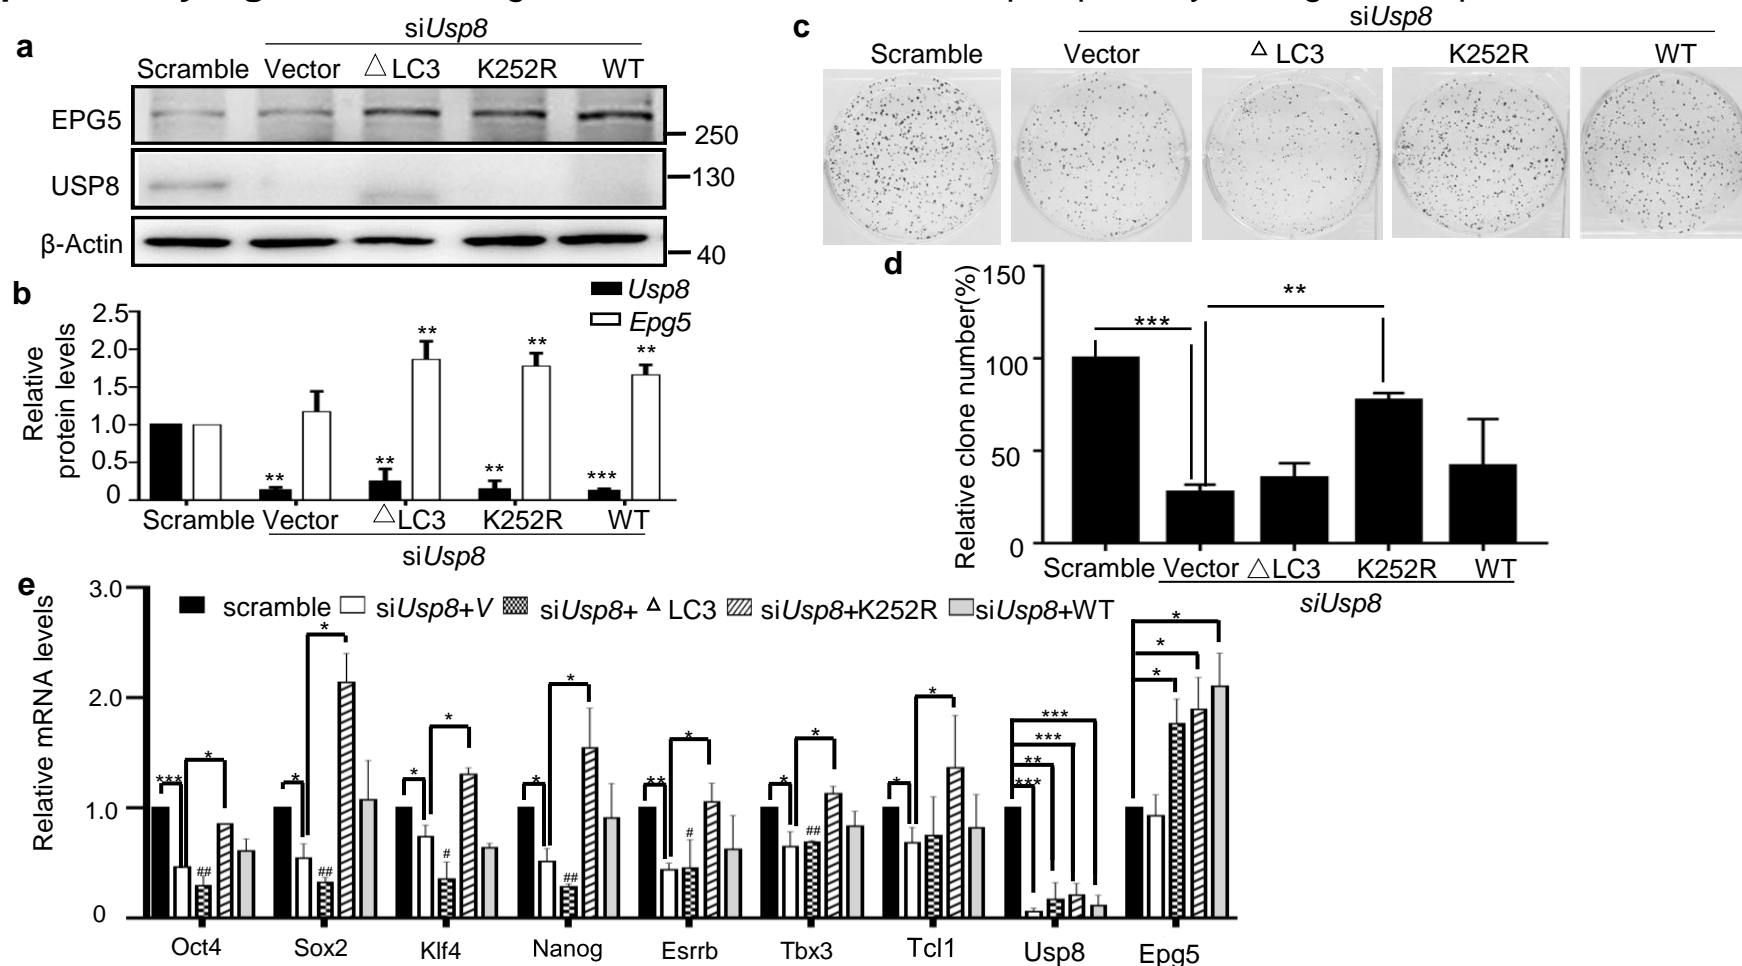

**Supplementary Figure 7** USP8 regulates ESC self-renewal and pluripotency through deubiquitination of EPG5. **(a)** Western blot analysis of whole cell extracts from scramble, *siUsp8*+vector, *siUsp8*+ $\Delta$ -LC3, *siUsp8*+K252R and *siUsp8*+WT ESCs.  $\beta$ -Actin served as a loading control. **(b)** Quantification of the EPG5 and USP8 expression in **a**. Error bars indicate the S.D.  $n=3$ . Three independent biological replicates. \*\*,  $P<0.01$ , \*\*\*,  $P<0.001$  by unpaired two-tailed Student's *t*-test. **(c)** The reduced colony formation ability of *siUsp8* ESCs is rescued by introduction of K252R *Usp8* but not the wide-type or  $\Delta$ -LC3 *Usp8* mutant. **(d)** Quantification of the colony formation in **c**. Error bars indicate the S.D.  $n=3$ . Three independent biological replicates. \*\*,  $P<0.01$ , \*\*\*,  $P<0.001$  by unpaired two-tailed Student's *t*-test. **(e)** The relative mRNA expression of pluripotency genes in scramble, *siUsp8*+vector, *siUsp8*+ $\Delta$ -LC3, *siUsp8*+K252R and *siUsp8*+WT ESCs was detected by quantitative PCR. Error bars indicate the S.D.  $n=3$ . Three independent biological replicates. #, *siUsp8*+ $\Delta$ -LC3 compare to scramble, \*, # $<0.05$ , \*\*, # $<0.01$ , \*\*\*, # $<0.001$ ,  $P<0.01$ , \*\*\*,  $P<0.001$  by unpaired two-tailed Student's *t*-test.

## Supplementary Figure 8 Depletion of EPG5 significantly decreased autophagic flux in ESCs

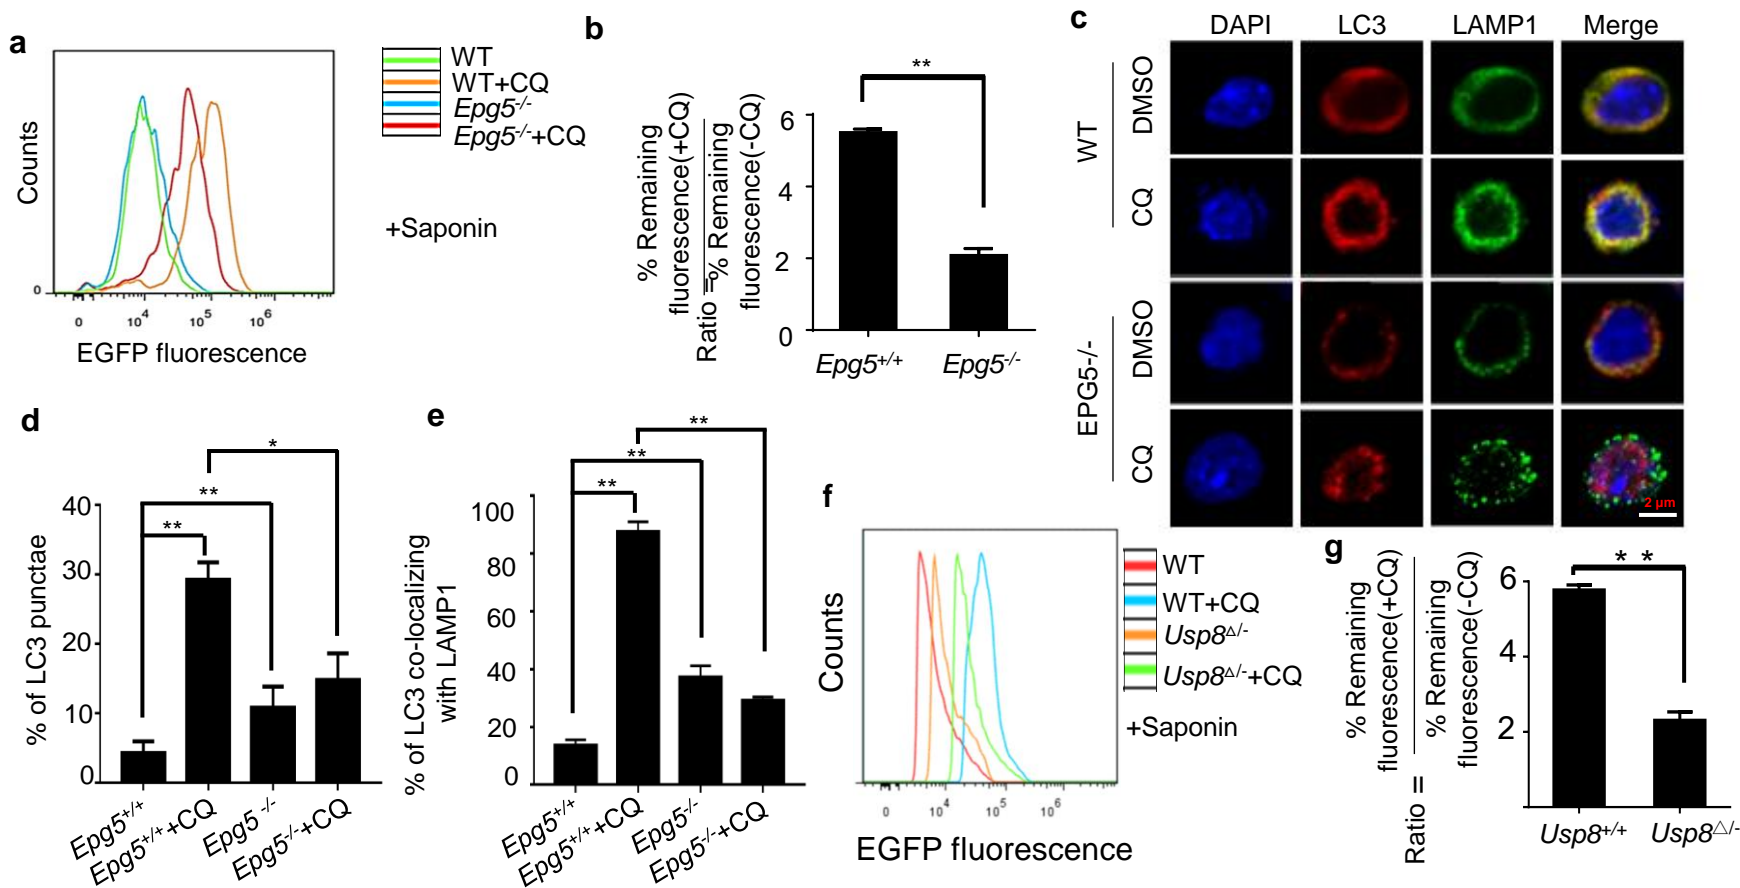

**Supplemental figure 8** Depletion of EPG5 significantly decreased autophagic flux in ESCs. **(a)** and **(b)** Flow cytometry for EGFP-LC3 in *Epg5*<sup>+/+</sup> and *Epg5*<sup>-/-</sup> ESCs treated with or without 10 nM chloroquine (CQ) for 5h. Error bars indicate the S.D. n = 3. Three independent biological replicates. \*\*, P<0.01 by unpaired two-tailed Student's *t*-test. **(c)** Confocal fluorescence micrographs of *Epg5*<sup>+/+</sup> and *Epg5*<sup>-/-</sup> ESCs treated with DMSO or 10 nM CQ for 5 hours. Images showing LAMP1 (green) and LC3 (red) co-localization and LC3 punctae. DAPI(blue), Scale bars, 2  $\mu$ m. **(d)** Quantification of LC3 punctae in *Epg5*<sup>+/+</sup> and *Epg5*<sup>-/-</sup> ESCs in the presence or absence of CQ. Error bars indicate the S.D. n = 3. Three independent biological replicates. \*, P<0.05, \*\*, P<0.01 by unpaired two-tailed Student's *t*-test. **(e)** Quantification of LAMP1 and LC3 colocalization in *Epg5*<sup>+/+</sup> and *Epg5*<sup>-/-</sup> ESCs in the presence or absence of CQ. Error bars indicate the S.D. n = 3. Three independent biological replicates. \*\*, P<0.01 by unpaired two-tailed Student's *t*-test. **(f)** and **(g)** Flow cytometry for EGFP-LC3 in *Usp8*<sup>+/+</sup> and *Usp8* <sup>$\Delta$ /-</sup> ESCs treated with or without 10 nM chloroquine (CQ) for 5h. Error bars indicate the S.D. n = 3. Three independent biological replicates. \*\*, P<0.01 by unpaired two-tailed Student's *t*-test.



**Supplementary Figure 9** USP8 and EGP5 decreases did not induce expression of differentiation marker

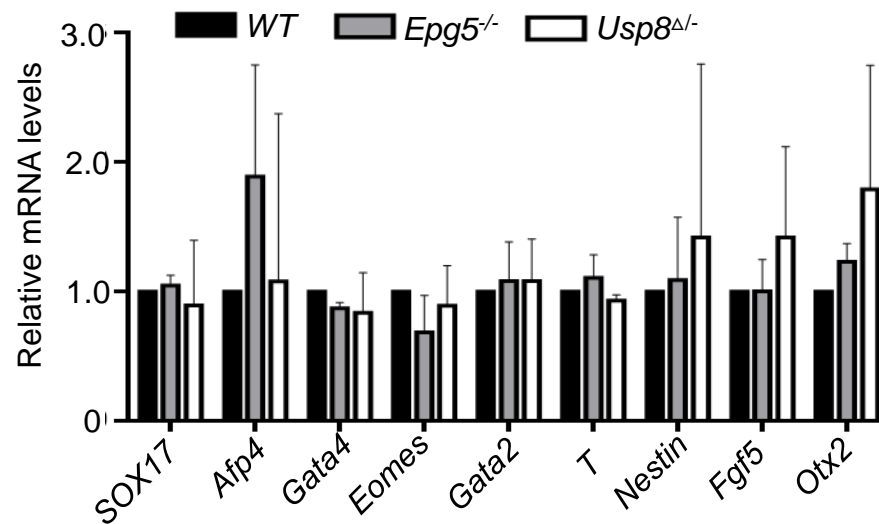

**Supplemental figure 9** USP8 and EGP5 decreases did not induce differentiation marker expression. The relative mRNA expression of 3 germ layer genes in *WT*, *Epg5*<sup>-/-</sup> and *Usp8*<sup>Δ/-</sup> ESCs. Error bars indicate the S.D. n = 3. Three independent biological replicates. NS, not significant by unpaired two-tailed Student's *t*-test.

## Supplementary Figure 10 EPG5 or USP8 silencing inhibits hESC self-renewal and pluripotency

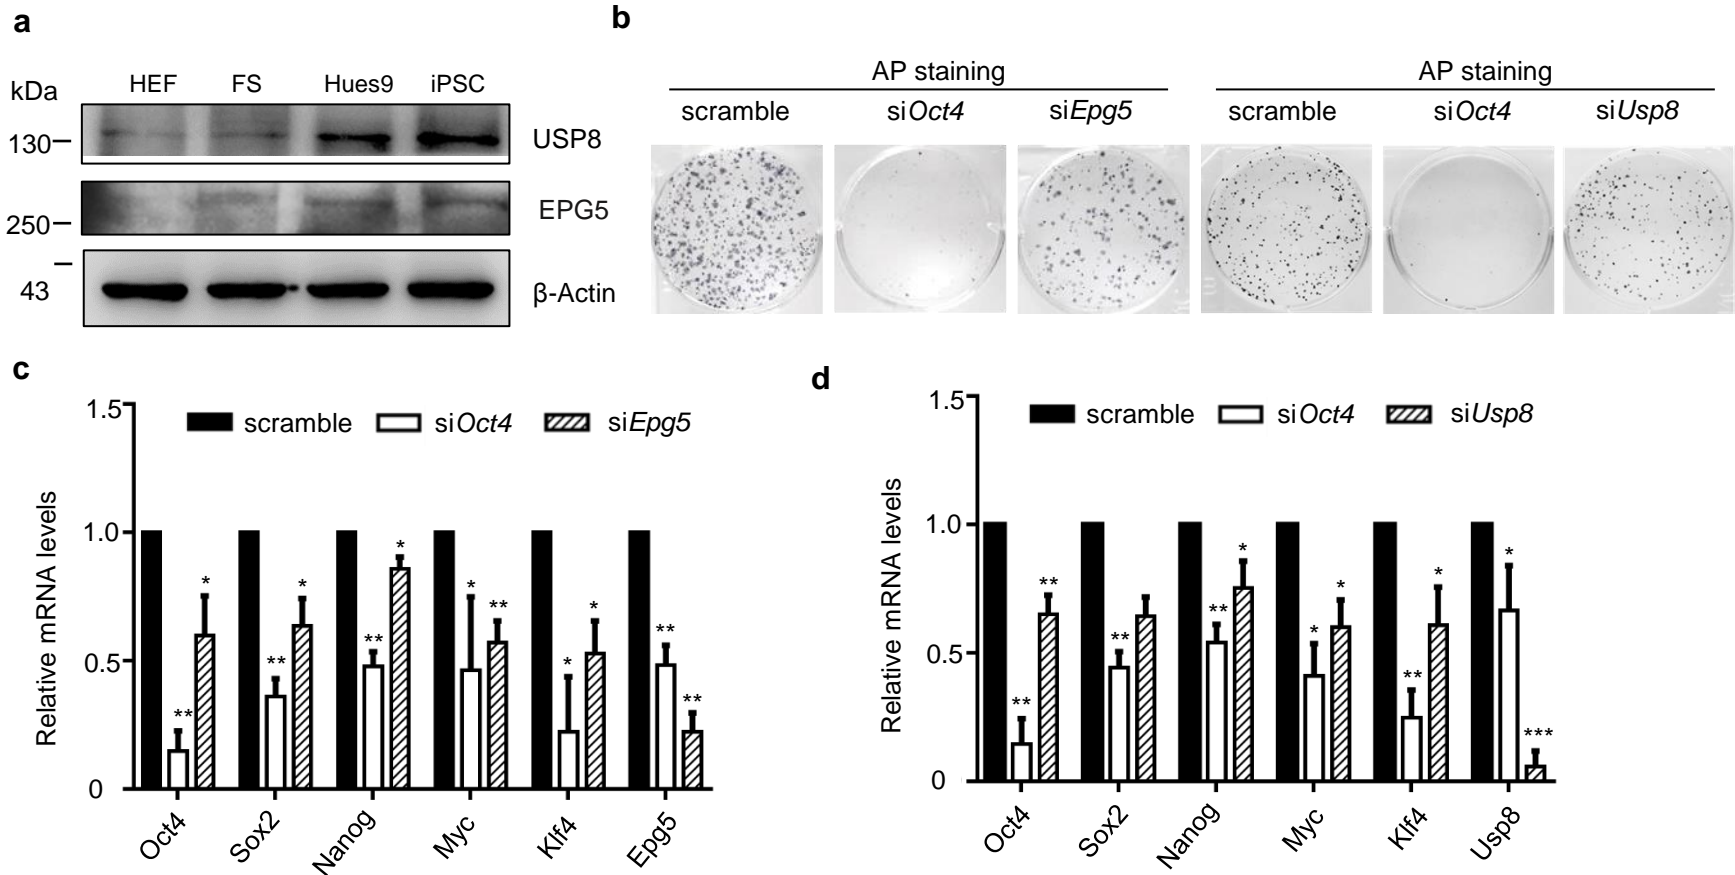

**Supplementary Figure 10** *Epg5* or *Usp8* silencing inhibits human ESC self-renewal and pluripotency. **(a)** Western blotting for USP8, EPG5 and  $\beta$ -actin in human embryonic fibroblast (HEF), Foreskin (FS), Hues9 ESC and iPSC. Images representative of 3 independent experiments. **(b)** Knockdown of *Epg5* or *Usp8* by specific siRNAs inhibits self-renewal of human ESCs.. **(c)** and **(d)** The relative mRNA expression of pluripotency genes was detected in hESCs transfected with scramble, siOct4 and siEpg5 siRNA. Error bars indicate the S.D. n=3. Three independent biological replicates. \*\*\*, P<0.001, \*\*, P<0.01, \*, P<0.05 by unpaired two-tailed Student's *t*-test (siUsp8 or siEpg5, siOct4 compare to scramble).

# Supplementary Figure 11 Original source data of the blotting images

Figure 1b

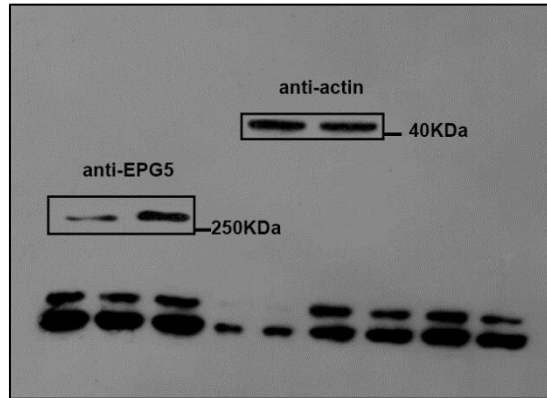

Figure 2a

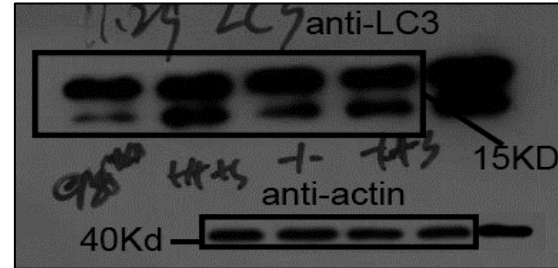

Figure 2c

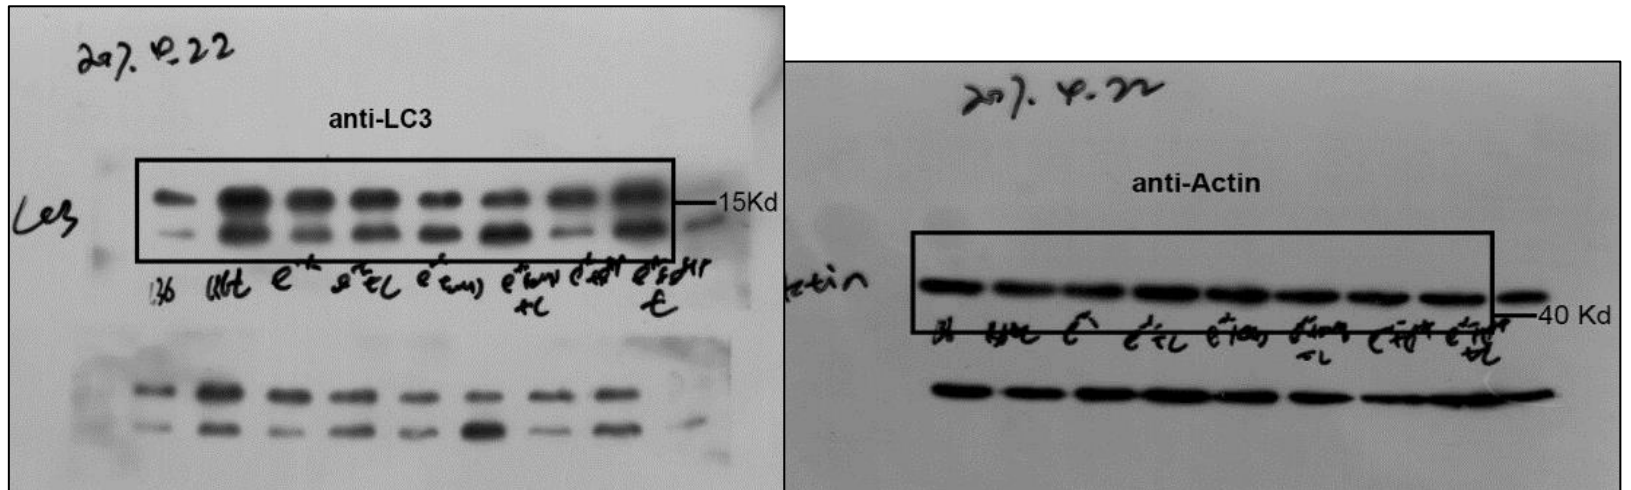

**Figure 3b**

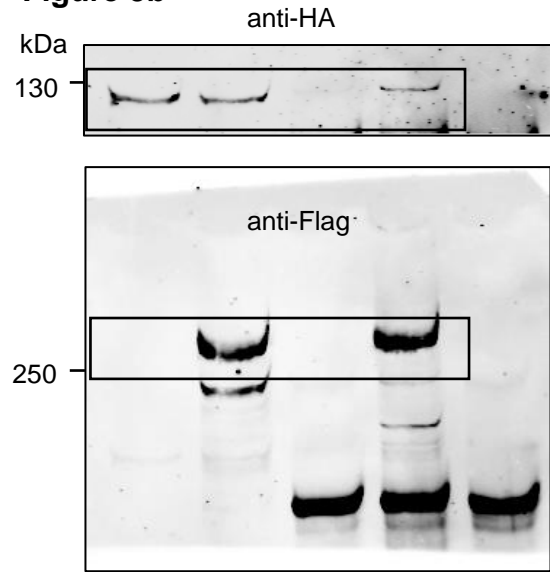

**Figure 3c**

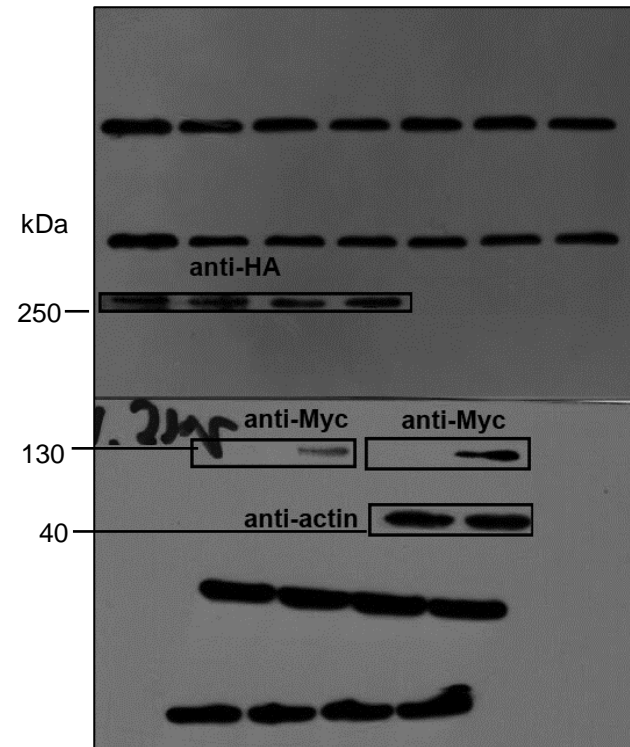

**Figure 3d**

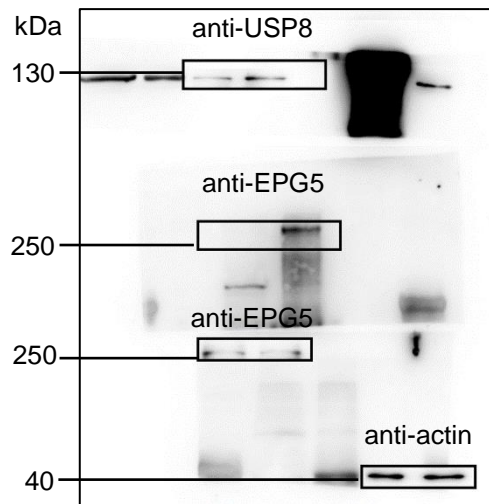



**Figure 5a**

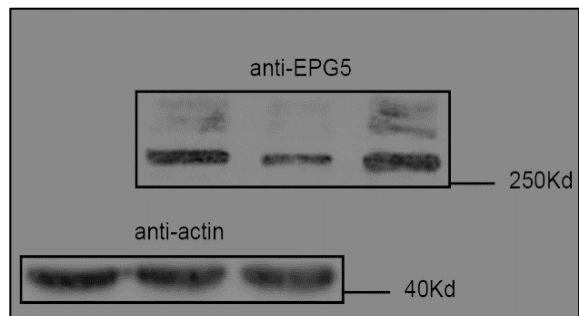

**Figure 5b**

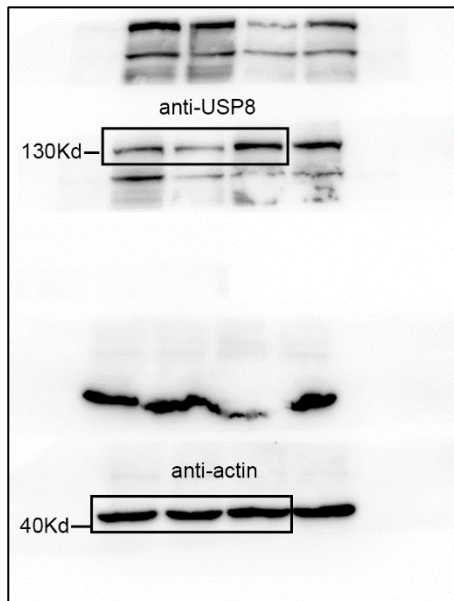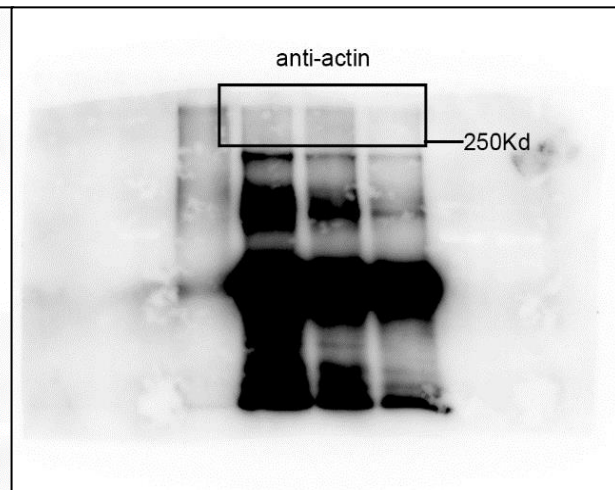

**Figure 5c**

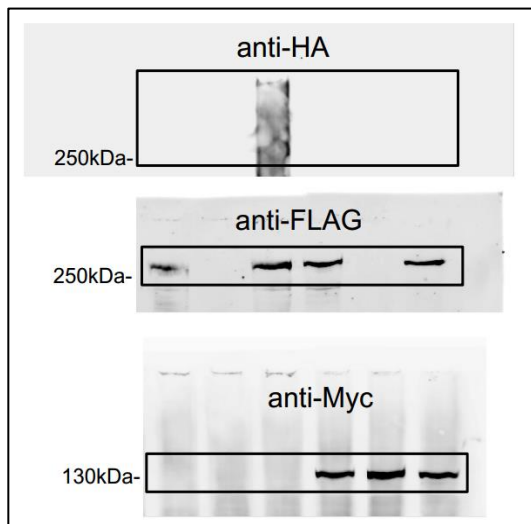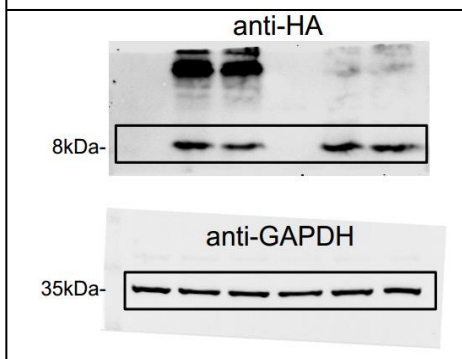

**Figure 5d**

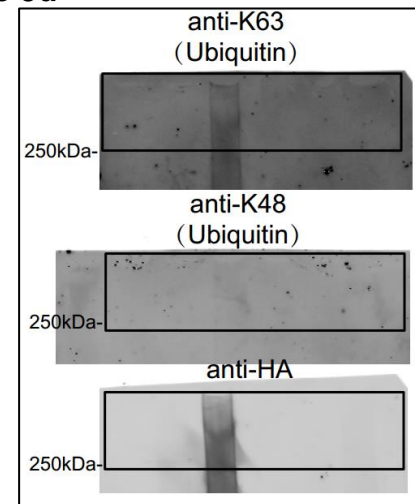

**Figure 5e**

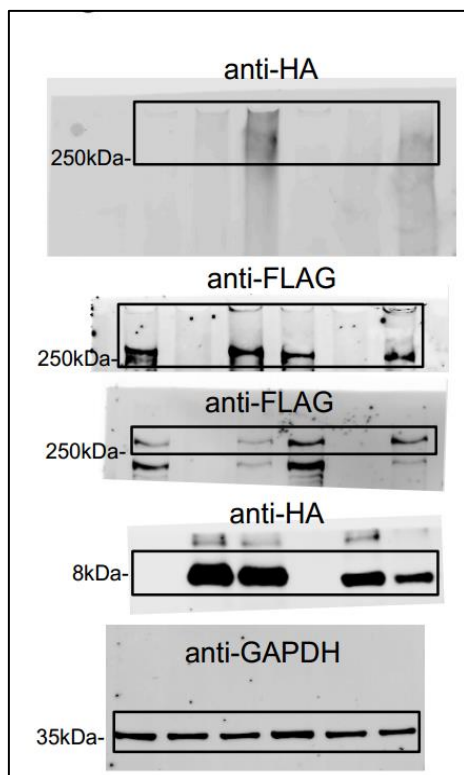

**Figure 5g**

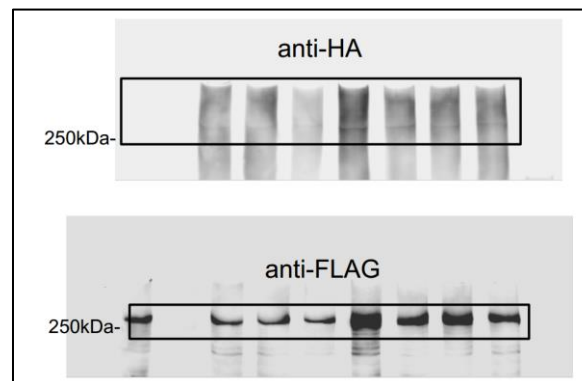

**Figure 6a**

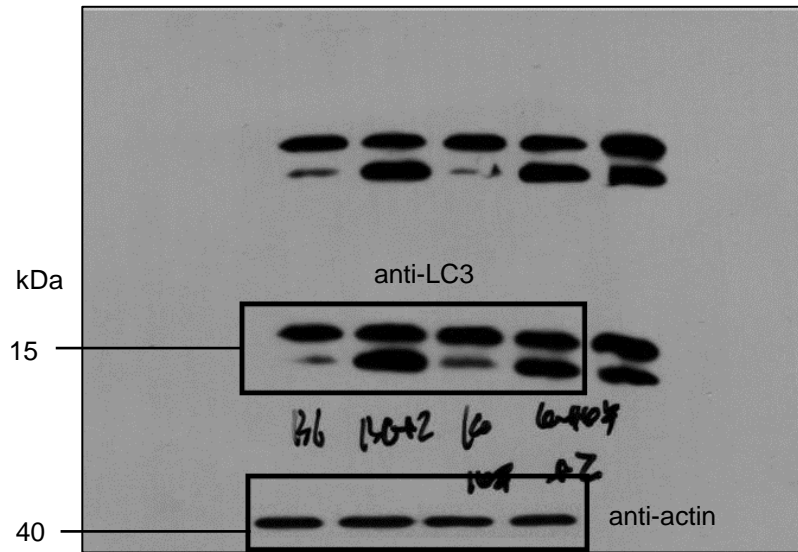

**Figure 6c**

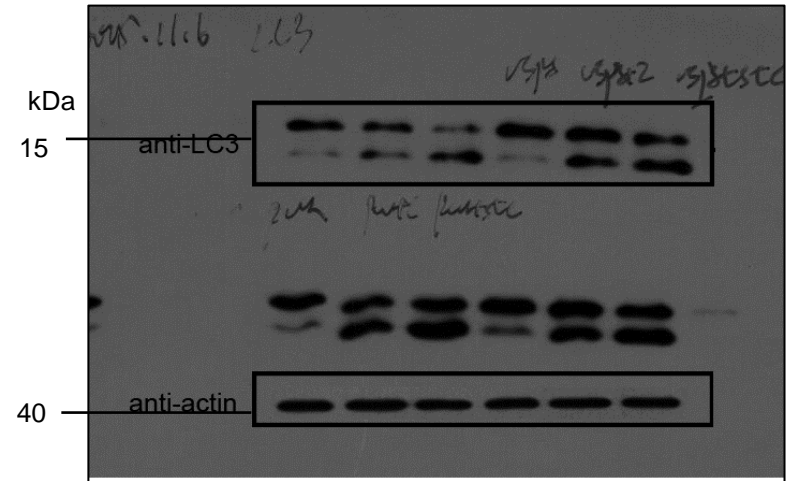

**Figure 6f**

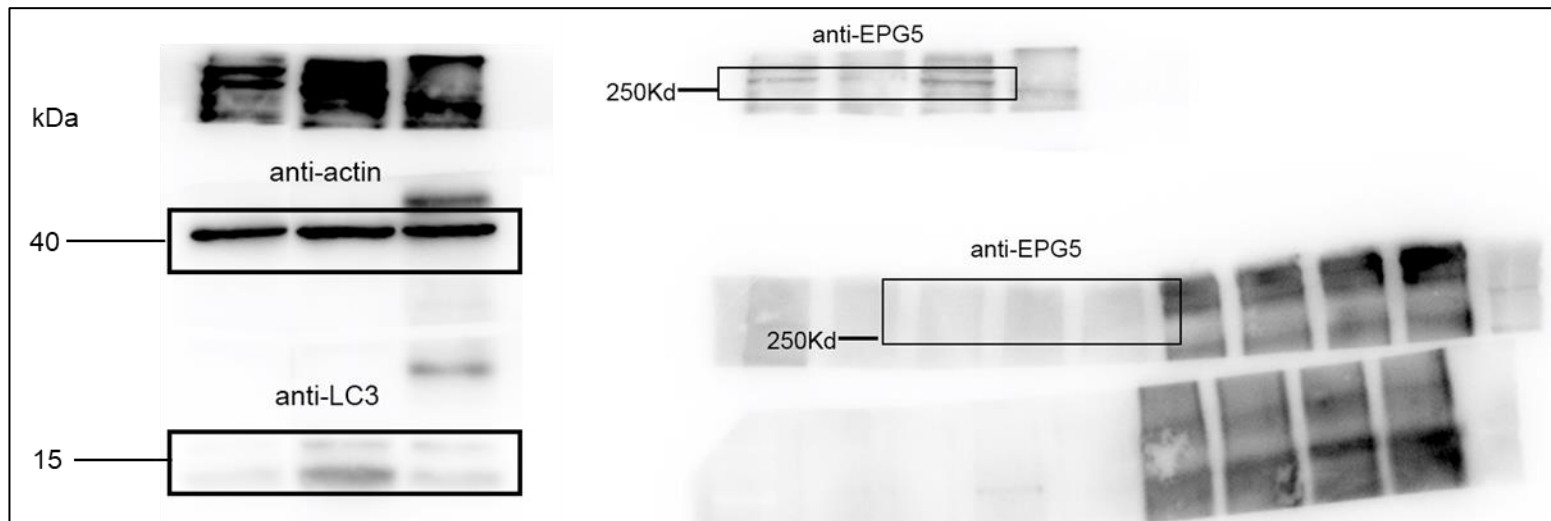



**Supplementary Figure 1f**

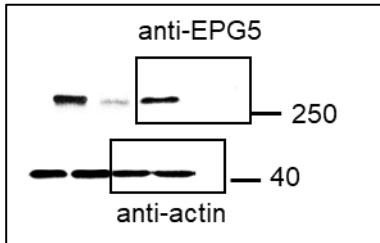

**Supplementary Figure 5a**

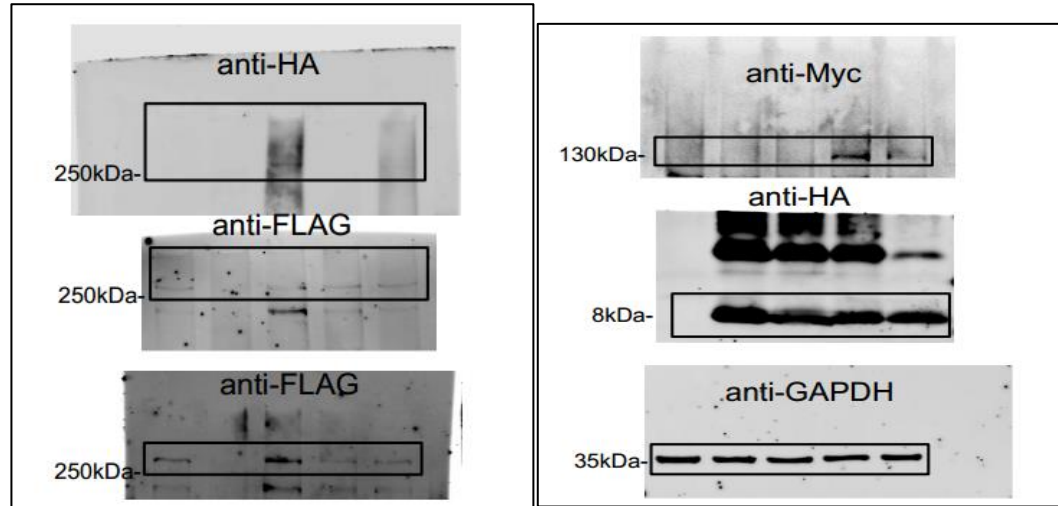

**Supplementary Figure 5b**

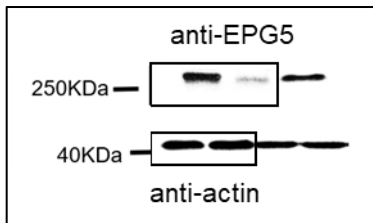

**Supplementary Figure 5c**

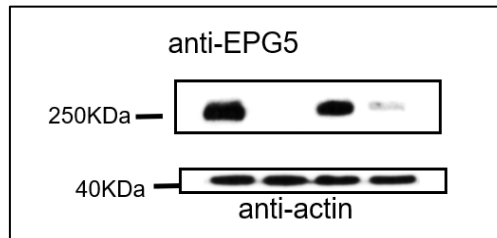

**Supplementary Figure 6a**

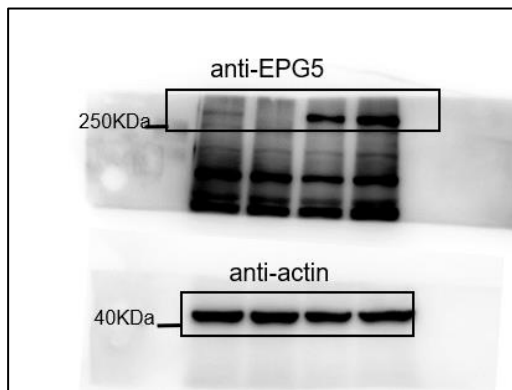

**Supplementary Figure 6b**

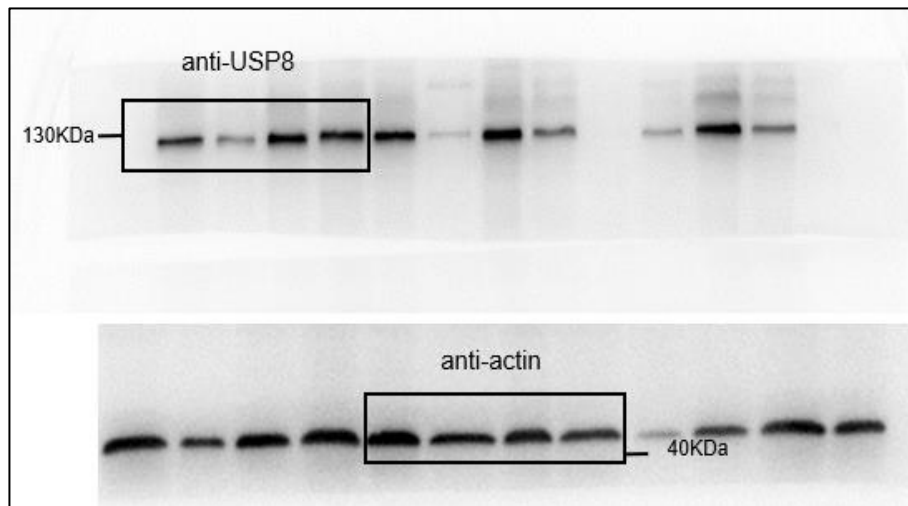

**Supplementary Figure 6c**

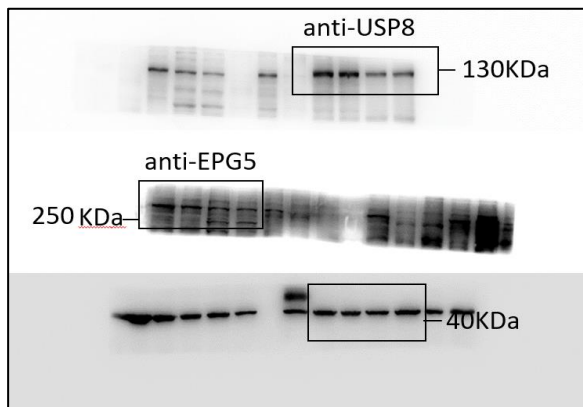

Supplementary Figure7a

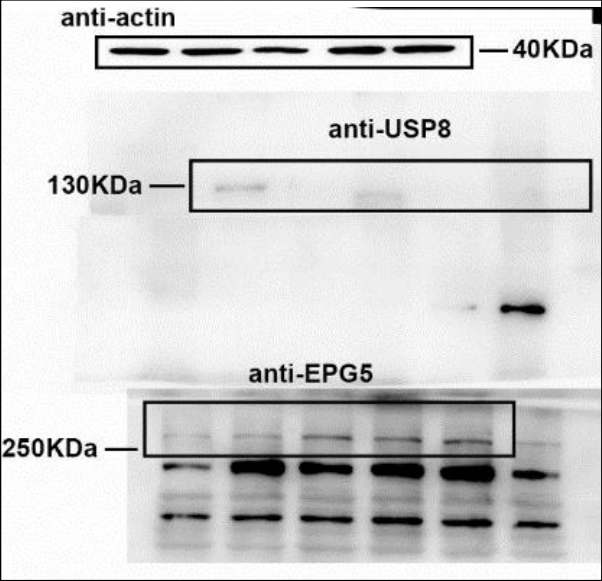

Supplementary Figure10a

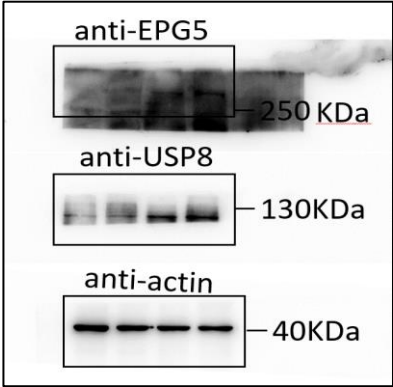

# Supplementary Tables

**Supplementary Table 1**

| Primer name    | Species | Forward sequences (5' - 3') | Reverse sequences (5' - 3') |
|----------------|---------|-----------------------------|-----------------------------|
| EPG5           | Mouse   | TTGGCTTTGTAAGTGGTCGG        | CACAGGCAGCCTTCTTTGTTC       |
| USP8           | Mouse   | AGACTCTCCGAAAGCCTTAAACT     | GCCGTTAATCCTTTGGGTTTTGG     |
| Oct4           | Mouse   | GTGGAGGAAGCCGACAACAATGA     | CAAGCTGATTGGCGATGTGAG       |
| Sox2           | Mouse   | TTGCAAAGGGTTTTTCGAGAC       | TGGAGGACTCATCCGAAGTC        |
| Nanog          | Mouse   | AAATTCCAGGTGATCTTGCG        | TGTCCTTGGGGTACAGTTGC        |
| Klf4           | Mouse   | GTGCCCC GACTAACCGTTG        | GTCGTTGAACTCCTCGGTCT        |
| Nanog          | Mouse   | TCTTCCTGGTCCCCACAGTTT       | GCAAGAATAGTTCTCGGGATGAA     |
| Esrrb          | Mouse   | CAGGCAAGGATGACAGACG         | GAGACAGCACGAAGGACTGC        |
| Sox17          | Mouse   | GATGCGGGATACGCCAGTG         | CCACCACCTCGCCTTTCAC         |
| Gata4          | Mouse   | CCCTACCCAGCCTACATGG         | ACATATCGAGATTGGGGTGTCT      |
| Gata2          | Mouse   | CACCCCGCCGTATTGAATG         | CCTGCGAGTCGAGATGGTTG        |
| Nestin         | Mouse   | CCCTGAAGTCGAGGAGCTG         | CTGCTGCACCTCTAAGCGA         |
| Otx2           | Mouse   | TATCTAAAGCAACCGCCTTACG      | AAGTCCATACCCGAAGTGGTC       |
| Fgf5           | Mouse   | CTGTATGGACCCACAGGGAGTAAC    | ATTAAGCTCCTGGGTCGCAAG       |
| T              | Mouse   | GCTTCAAGGAGCTAACTAACGAG     | CCAGCAAGAAAGAGTACATGGC      |
| Eomes          | Mouse   | GCGCATGTTTCTTTCTTGAG        | GGTCGGCCAGAACCACTTC         |
| Afp4           | Mouse   | CTTCCCTCATCCTCCTGCTAC       | ACAAACTGGGTAAAGGTGATGG      |
| $\beta$ -actin | Mouse   | GGCTGTATTCCCCTCCATCG        | CCAGTTGGTAACAATGCCATGT      |
| EPG5           | Human   | GCCATTGCCTTCAAGATGGG        | TGGCCAAACTGAGCTCTACA        |
| USP8           | Human   | AAGGAGCAATCACAGCAAAGG       | CTGCATTCTTCGAGCATCCATTA     |
| Oct4           | Human   | TTCGGGCACTGCAGGAACAAATTC    | TATGCAAAGCAGAAACCTCGTGC     |
| Sox2           | Human   | CACAGCAAATGACAGCTGCAA       | GTCGGCATCGCGGTTTT           |
| Nanog          | Human   | TTTGTGGGCCTGAAGAAAAT        | AGGGCTGTCCTGAATAAGCAG       |
| Myc            | Human   | ACTCTGAGGAGGAACAAGAA        | TGGAGACGTGGCACCTCTT         |
| Kl4            | Human   | TCTCAAGGCACACCTGCGAA        | TAGTGCCTGGTCAGTTCATC        |
| $\beta$ -actin | Human   | TGAAGTGTGACGTGGACATC        | GGAGGAGCAATGATCTTGAT        |

**Supplementary Table 1** List of primers for Quantitative real-time PCR
